# Supplementary material for: Radiopaque polymeric spinal cages: a prototype study
Source: Royal Society of Chemistry journal article supplement (doi:10.1039/b407228f), 2004-01-01
Supplement: b407228f.pdf [file b407228f.pdf]

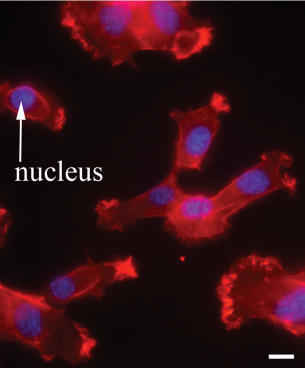

(a)

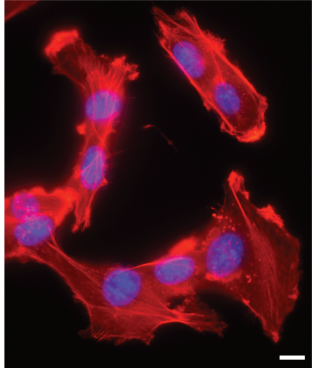

(b)

Fig. 9 Cell-attachment to (a) I-copolymer, (b) control; scale bar = 10  $\mu\text{m}$ . F-actin is stained red and the cell nuclei are stained blue.
